# Supplementary material
Source: Springer Nature journal article supplement (https://www.springermedizin.de/resource/supplementary/12888_2014_1691_MOESM1_ESM.docx/9481206)
Supplement: MOESM1 [file 9481206]

**Figure 1: Breakdown of study sample with code names indicated**

10 caregivers (CG) of those with severe mental disorder

- Maternal depression (MD) – 20
- Depression with HIV+ (DH)- 15
- Schizophrenia & Bi-polar - 10

87 participants

45 service users

- Nurses (N)– 10
- Lay counsellors (LC) – 20
- Auxiliary social workers (ASW) - 2

32 health care srevice providers
